# Supplementary material for: Elevated serum human epididymis protein 4 is associated with disease severity and worse survival in idiopathic pulmonary fibrosis: a cohort study
Source: PubMed Central journal article supplement — Ann Transl Med. 2022 Sep;10(18):992. doi: 10.21037/atm-22-4042 (PMC9577718; doi:10.21037/atm-22-4042), 2022-09
Supplement: atm-10-18-992-dss.pdf [file atm-10-18-992-dss.pdf]

## Data Sharing Statement

|                     |                                                                                                                                                     |                                                                                                                 |
|---------------------|-----------------------------------------------------------------------------------------------------------------------------------------------------|-----------------------------------------------------------------------------------------------------------------|
| <b>Article Info</b> | <a href="https://dx.doi.org/10.21037/atm-22-4042">https://dx.doi.org/10.21037/atm-22-4042</a>                                                       |                                                                                                                 |
| <b>Item</b>         | <b>Question</b>                                                                                                                                     | <b>Authors' Response<br/>(place "-" if not applicable)</b>                                                      |
| 1                   | Would you like to share data collected for your study to others?                                                                                    | Yes                                                                                                             |
| 2                   | If not, would you like to share the reason for your decision?                                                                                       | -                                                                                                               |
| 3                   | What data in particular will be shared?                                                                                                             | The survival data in particular will be shared.                                                                 |
| 4                   | Any other documents will be shared? Such as study protocol, statistical analysis plan, informed consent form, clinical study report, analytic code. | Statistical analysis plan, informed consent form, and clinical study report will also be shared if requested    |
| 5                   | When will data availability begin?                                                                                                                  | The data can be shared with others when this paper was published.                                               |
| 6                   | When will data availability end?                                                                                                                    | Two years within the publication date, since the technique or survival data may be updated over time            |
| 7                   | To whom will you share the data?                                                                                                                    | Researchers who are interested in our field.                                                                    |
| 8                   | For what type of analysis or purpose?                                                                                                               | For analysis to evaluate the prognostic value of HE4 in IPF patients                                            |
| 9                   | How or where can the data/documents be obtained?                                                                                                    | Emails could be sent to the address below to obtain the shared data: 1255206251@qq.com                          |
| 10                  | Any other restrictions?                                                                                                                             | We may balance the potential benefits and risks for each request and then provide the data that could be shared |
